# Supplementary material
Source: Springer Nature journal article supplement (https://www.springermedizin.de/resource/supplementary/12955_2012_1064_MOESM1_ESM.pdf/9558964)

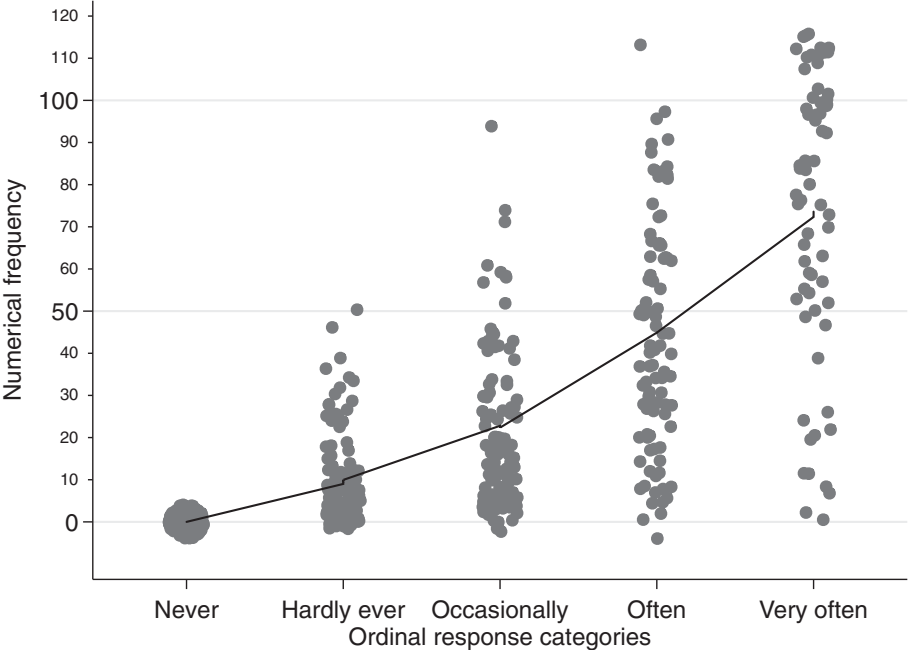

Supplement: MOESM1 [file 9558964]
